# Supplementary material for: Fibroblasts accelerate islet revascularization and improve long-term graft survival in a mouse model of subcutaneous islet transplantation
Source: PubMed Central journal article supplement (PMC5495486; doi:10.1371/journal.pone.0180695), 2017-07-03
Supplement: pone.0180695.s003.pdf [file pone.0180695.s003.pdf]

## Day 1

---

### Prob SET\_ID

| Specific PSI-F genes | Specific PSI genes | Common genes |
|----------------------|--------------------|--------------|
| 1415861_at           | 1416152_a_at       | 1415712_at   |
| 1416002_x_at         | 1416505_at         | 1415983_at   |
| 1416332_at           | 1416687_at         | 1416053_at   |
| 1416380_at           | 1417262_at         | 1416151_at   |
| 1416407_at           | 1417263_at         | 1416191_at   |
| 1416530_a_at         | 1417697_at         | 1416200_at   |
| 1416627_at           | 1417954_at         | 1416226_at   |
| 1416832_at           | 1418344_at         | 1416246_a_at |
| 1417101_at           | 1418534_at         | 1416295_a_at |
| 1417155_at           | 1418626_a_at       | 1416296_at   |
| 1417234_at           | 1419075_s_at       | 1416318_at   |
| 1417256_at           | 1419100_at         | 1416333_at   |
| 1417580_s_at         | 1419219_at         | 1416356_at   |
| 1417717_a_at         | 1419449_a_at       | 1416431_at   |
| 1417765_a_at         | 1420249_s_at       | 1416527_at   |
| 1417870_x_at         | 1420398_at         | 1416561_at   |
| 1418028_at           | 1421186_at         | 1416576_at   |
| 1418061_at           | 1421854_at         | 1416617_at   |
| 1418126_at           | 1422672_at         | 1416714_at   |
| 1418133_at           | 1422868_s_at       | 1416776_at   |
| 1418173_at           | 1423233_at         | 1416871_at   |
| 1418317_at           | 1423396_at         | 1416897_at   |
| 1418345_at           | 1423723_s_at       | 1416926_at   |
| 1418396_at           | 1424157_at         | 1416935_at   |
| 1418440_at           | 1424271_at         | 1416981_at   |
| 1418487_at           | 1424296_at         | 1416983_s_at |
| 1418652_at           | 1424443_at         | 1416985_at   |
| 1418825_at           | 1424495_a_at       | 1417025_at   |
| 1418946_at           | 1424717_at         | 1417104_at   |
| 1419060_at           | 1425040_at         | 1417141_at   |

|              |              |              |
|--------------|--------------|--------------|
| 1419128_at   | 1425431_at   | 1417244_a_at |
| 1419132_at   | 1425480_at   | 1417266_at   |
| 1419135_at   | 1425655_at   | 1417268_at   |
| 1419149_at   | 1425958_at   | 1417273_at   |
| 1419369_at   | 1426536_at   | 1417292_at   |
| 1419378_a_at | 1426958_at   | 1417314_at   |
| 1419404_s_at | 1427180_at   | 1417392_a_at |
| 1419455_at   | 1427256_at   | 1417426_at   |
| 1419465_at   | 1427544_a_at | 1417522_at   |
| 1419466_at   | 1427584_at   | 1417523_at   |
| 1419555_at   | 1427884_at   | 1417620_at   |
| 1419676_at   | 1428129_at   | 1417676_a_at |
| 1419697_at   | 1428306_at   | 1417793_at   |
| 1420161_at   | 1428748_at   | 1417802_at   |
| 1420465_s_at | 1428768_at   | 1417803_at   |
| 1420657_at   | 1429297_at   | 1417813_at   |
| 1420991_at   | 1429478_at   | 1417821_at   |
| 1420992_at   | 1429679_at   | 1417876_at   |
| 1421106_at   | 1429693_at   | 1417936_at   |
| 1421578_at   | 1430485_at   | 1417961_a_at |
| 1421680_at   | 1430991_at   | 1418008_at   |
| 1421998_at   | 1431830_at   | 1418099_at   |
| 1422095_a_at | 1432205_a_at | 1418131_at   |
| 1422523_at   | 1433466_at   | 1418174_at   |
| 1422601_at   | 1433902_at   | 1418188_a_at |
| 1422633_at   | 1434068_s_at | 1418189_s_at |
| 1422783_a_at | 1434362_at   | 1418191_at   |
| 1422808_s_at | 1434430_s_at | 1418204_s_at |
| 1422962_a_at | 1434618_at   | 1418206_at   |
| 1423100_at   | 1434940_x_at | 1418240_at   |
| 1423174_a_at | 1435059_at   | 1418248_at   |
| 1423175_s_at | 1435190_at   | 1418261_at   |
| 1423182_at   | 1435271_at   | 1418293_at   |
| 1423294_at   | 1435426_s_at | 1418323_at   |
| 1423375_at   | 1435585_at   | 1418340_at   |

|              |              |              |
|--------------|--------------|--------------|
| 1423428_at   | 1435639_at   | 1418379_s_at |
| 1423467_at   | 1436472_at   | 1418392_a_at |
| 1423570_at   | 1436594_at   | 1418465_at   |
| 1423754_at   | 1437121_at   | 1418480_at   |
| 1424338_at   | 1437240_at   | 1418483_a_at |
| 1424475_at   | 1437245_at   | 1418580_at   |
| 1424518_at   | 1437576_at   | 1418612_at   |
| 1424526_a_at | 1437904_at   | 1418641_at   |
| 1424654_at   | 1438104_at   | 1418666_at   |
| 1424824_at   | 1438130_at   | 1418697_at   |
| 1424832_at   | 1438349_at   | 1418706_at   |
| 1424923_at   | 1438377_x_at | 1418742_at   |
| 1425228_a_at | 1438483_at   | 1418747_at   |
| 1425303_at   | 1438676_at   | 1418806_at   |
| 1425394_at   | 1438796_at   | 1418809_at   |
| 1425405_a_at | 1439764_s_at | 1418826_at   |
| 1425567_a_at | 1441233_at   | 1418842_at   |
| 1425663_at   | 1441956_s_at | 1418930_at   |
| 1425719_a_at | 1441958_s_at | 1418932_at   |
| 1425801_x_at | 1442222_at   | 1418936_at   |
| 1425829_a_at | 1442538_at   | 1418945_at   |
| 1426276_at   | 1442798_x_at | 1418989_at   |
| 1426383_at   | 1443323_at   | 1419004_s_at |
| 1426487_a_at | 1443540_at   | 1419042_at   |
| 1426726_at   | 1443621_at   | 1419043_a_at |
| 1426852_x_at | 1444179_at   | 1419098_at   |
| 1426871_at   | 1444728_at   | 1419099_x_at |
| 1426970_a_at | 1446006_at   | 1419120_at   |
| 1427007_at   | 1447494_at   | 1419186_a_at |
| 1427055_at   | 1447830_s_at | 1419194_s_at |
| 1427280_at   | 1448124_at   | 1419209_at   |
| 1427378_at   | 1448239_at   | 1419249_at   |
| 1427511_at   | 1448995_at   | 1419282_at   |
| 1428186_at   | 1449282_at   | 1419296_at   |
| 1428273_at   | 1449310_at   | 1419309_at   |

|              |              |              |
|--------------|--------------|--------------|
| 1428352_at   | 1449341_a_at | 1419321_at   |
| 1428392_at   | 1450714_at   | 1419323_at   |
| 1428485_at   | 1451053_a_at | 1419329_at   |
| 1428660_s_at | 1451289_at   | 1419394_s_at |
| 1428767_at   | 1451319_at   | 1419431_at   |
| 1428838_a_at | 1451762_a_at | 1419463_at   |
| 1428853_at   | 1451989_a_at | 1419474_a_at |
| 1429006_s_at | 1452049_at   | 1419480_at   |
| 1429053_at   | 1452093_at   | 1419481_at   |
| 1429247_at   | 1452374_at   | 1419482_at   |
| 1429413_at   | 1452610_at   | 1419483_at   |
| 1429469_at   | 1452857_at   | 1419487_at   |
| 1429530_a_at | 1452881_at   | 1419507_at   |
| 1429598_at   | 1453590_at   | 1419526_at   |
| 1430036_at   | 1453775_at   | 1419537_at   |
| 1430460_at   | 1454240_at   | 1419549_at   |
| 1430575_a_at | 1454768_at   | 1419561_at   |
| 1430576_at   | 1454967_at   | 1419569_a_at |
| 1431339_a_at | 1455096_at   | 1419573_a_at |
| 1431805_a_at | 1455778_at   | 1419591_at   |
| 1433596_at   | 1455967_at   | 1419598_at   |
| 1434046_at   | 1456288_at   | 1419599_s_at |
| 1434275_at   | 1456632_at   | 1419603_at   |
| 1434372_at   | 1456854_at   | 1419604_at   |
| 1434413_at   | 1456864_at   | 1419609_at   |
| 1434628_a_at | 1456956_at   | 1419610_at   |
| 1434777_at   | 1457532_at   | 1419627_s_at |
| 1435077_at   | 1457721_at   | 1419631_at   |
| 1435110_at   | 1457970_at   | 1419707_at   |
| 1435125_at   | 1458099_at   | 1419714_at   |
| 1435313_at   | 1459202_at   | 1419728_at   |
| 1435562_at   | 1459948_at   | 1419764_at   |
| 1435872_at   | 1460121_at   | 1419767_at   |
| 1435903_at   | 1460521_a_at | 1419840_at   |
| 1435945_a_at | 1460600_at   | 1419874_x_at |

1436032\_at  
1436037\_at  
1436236\_x\_at  
1436309\_at  
1436397\_at  
1436398\_at  
1436453\_at  
1436515\_at  
1436532\_at  
1436557\_at  
1436562\_at  
1436576\_at  
1436613\_at  
1436737\_a\_at  
1436791\_at  
1436913\_at  
1437162\_at  
1437303\_at  
1437445\_at  
1437558\_at  
1437668\_at  
1437751\_at  
1437788\_at  
1438059\_at  
1438259\_at  
1438306\_at  
1438345\_at  
1438385\_s\_at  
1438403\_s\_at  
1438475\_at  
1438487\_s\_at  
1438531\_at  
1438814\_at  
1438879\_at  
1439163\_at

1420310\_at  
1420330\_at  
1420331\_at  
1420358\_at  
1420361\_at  
1420380\_at  
1420394\_s\_at  
1420409\_at  
1420415\_at  
1420438\_at  
1420464\_s\_at  
1420498\_a\_at  
1420538\_at  
1420575\_at  
1420599\_at  
1420671\_x\_at  
1420674\_at  
1420686\_at  
1420697\_at  
1420699\_at  
1420703\_at  
1420728\_at  
1420751\_at  
1420779\_at  
1420804\_s\_at  
1420915\_at  
1420970\_at  
1421008\_at  
1421009\_at  
1421074\_at  
1421075\_s\_at  
1421187\_at  
1421188\_at  
1421217\_a\_at  
1421228\_at

1439221\_s\_at  
1439638\_at  
1439773\_at  
1439831\_at  
1440010\_at  
1440068\_at  
1440123\_at  
1440347\_at  
1440720\_s\_at  
1440789\_at  
1440799\_s\_at  
1440840\_at  
1440883\_at  
1441083\_at  
1441111\_at  
1441231\_at  
1441315\_s\_at  
1441346\_at  
1441991\_at  
1442044\_at  
1442169\_at  
1442358\_at  
1442416\_at  
1442426\_at  
1442640\_at  
1443167\_at  
1443299\_at  
1443591\_at  
1443858\_at  
1444061\_at  
1444447\_at  
1444494\_at  
1444740\_at  
1445866\_at  
1445873\_at

1421262\_at  
1421326\_at  
1421408\_at  
1421457\_a\_at  
1421492\_at  
1421525\_a\_at  
1421551\_s\_at  
1421589\_at  
1421596\_s\_at  
1421644\_at  
1421689\_at  
1421691\_at  
1421694\_a\_at  
1421698\_a\_at  
1421856\_at  
1421911\_at  
1421977\_at  
1422013\_at  
1422041\_at  
1422046\_at  
1422062\_at  
1422124\_a\_at  
1422160\_at  
1422190\_at  
1422191\_at  
1422209\_s\_at  
1422264\_s\_at  
1422317\_a\_at  
1422324\_a\_at  
1422341\_s\_at  
1422430\_at  
1422446\_x\_at  
1422447\_at  
1422562\_at  
1422570\_at

1446504\_at  
1446511\_at  
1446553\_at  
1446649\_at  
1447116\_at  
1447211\_at  
1448163\_at  
1448377\_at  
1448380\_at  
1448421\_s\_at  
1448452\_at  
1448457\_at  
1448470\_at  
1448485\_at  
1448601\_s\_at  
1448823\_at  
1448932\_at  
1449161\_at  
1449378\_at  
1449533\_at  
1449873\_at  
1449901\_a\_at  
1450032\_at  
1450264\_a\_at  
1450475\_at  
1450495\_a\_at  
1450641\_at  
1450672\_a\_at  
1450699\_at  
1450753\_at  
1451097\_at  
1451374\_x\_at  
1451415\_at  
1451478\_at  
1451626\_x\_at

1422628\_at  
1422755\_at  
1422771\_at  
1422875\_at  
1422903\_at  
1422932\_a\_at  
1422953\_at  
1422973\_a\_at  
1422977\_at  
1422978\_at  
1423017\_a\_at  
1423150\_at  
1423547\_at  
1423555\_a\_at  
1423569\_at  
1423590\_at  
1423753\_at  
1423768\_at  
1423858\_a\_at  
1423860\_at  
1424033\_at  
1424211\_at  
1424254\_at  
1424302\_at  
1424312\_at  
1424339\_at  
1424349\_a\_at  
1424375\_s\_at  
1424524\_at  
1424552\_at  
1424655\_at  
1424683\_at  
1424713\_at  
1424727\_at  
1424737\_at

1451755\_a\_at  
1451821\_a\_at  
1452067\_at  
1452178\_at  
1452287\_at  
1452345\_at  
1452483\_a\_at  
1452500\_at  
1452606\_at  
1453009\_at  
1453136\_at  
1453299\_a\_at  
1453304\_s\_at  
1453344\_at  
1453455\_at  
1453757\_at  
1454734\_at  
1454806\_at  
1455007\_s\_at  
1455136\_at  
1455220\_at  
1455401\_at  
1455787\_x\_at  
1455886\_at  
1456156\_at  
1456395\_at  
1456688\_at  
1456705\_at  
1457321\_at  
1457586\_at  
1457742\_at  
1457779\_at  
1458018\_at  
1458065\_at  
1458382\_a\_at

1424754\_at  
1424775\_at  
1424857\_a\_at  
1424921\_at  
1424927\_at  
1424965\_at  
1425001\_at  
1425025\_at  
1425065\_at  
1425099\_a\_at  
1425214\_at  
1425225\_at  
1425237\_at  
1425374\_at  
1425407\_s\_at  
1425420\_s\_at  
1425430\_at  
1425434\_a\_at  
1425435\_at  
1425451\_s\_at  
1425548\_a\_at  
1425598\_a\_at  
1425609\_at  
1425662\_at  
1425850\_a\_at  
1425860\_x\_at  
1425863\_a\_at  
1425872\_at  
1425894\_at  
1425917\_at  
1425951\_a\_at  
1426039\_a\_at  
1426203\_at  
1426278\_at  
1426413\_at



1458603\_at  
1459170\_at  
1460048\_at  
1460231\_at  
1460463\_at  
AFFX-b-ActinMur/M12481\_M\_at

1426415\_a\_at  
1426454\_at  
1426505\_at  
1426604\_at  
1426774\_at  
1426806\_at  
1426851\_a\_at  
1426971\_at  
1427041\_at  
1427076\_at  
1427102\_at  
1427115\_at  
1427118\_at  
1427179\_at  
1427200\_at  
1427211\_at  
1427290\_at  
1427301\_at  
1427321\_s\_at  
1427327\_at  
1427339\_at  
1427365\_at  
1427366\_at  
1427381\_at  
1427388\_at  
1427397\_at  
1427483\_at  
1427540\_at  
1427549\_s\_at  
1427556\_at  
1427566\_at  
1427719\_s\_at  
1427747\_a\_at  
1427751\_a\_at  
1427892\_at

1427994\_at  
1428007\_at  
1428018\_a\_at  
1428079\_at  
1428083\_at  
1428130\_at  
1428288\_at  
1428294\_at  
1428492\_at  
1428786\_at  
1428787\_at  
1428926\_at  
1429140\_at  
1429169\_at  
1429184\_at  
1429235\_at  
1429524\_at  
1429525\_s\_at  
1429570\_at  
1429775\_a\_at  
1429831\_at  
1429914\_at  
1429944\_at  
1429947\_a\_at  
1429954\_at  
1429957\_at  
1430126\_at  
1430132\_at  
1430447\_a\_at  
1430509\_at  
1430579\_at  
1430581\_at  
1430584\_s\_at  
1430612\_at  
1430623\_s\_at

1430635\_at  
1430655\_at  
1430669\_at  
1430700\_a\_at  
1430703\_at  
1430731\_at  
1431166\_at  
1431171\_at  
1431182\_at  
1431504\_at  
1431591\_s\_at  
1431650\_at  
1431705\_a\_at  
1431836\_x\_at  
1431843\_a\_at  
1432026\_a\_at  
1432540\_at  
1432548\_at  
1432885\_at  
1433147\_at  
1433434\_at  
1433465\_a\_at  
1433593\_at  
1433617\_s\_at  
1433678\_at  
1433711\_s\_at  
1433741\_at  
1433836\_a\_at  
1433837\_at  
1433877\_at  
1433963\_a\_at  
1434067\_at  
1434099\_at  
1434100\_x\_at  
1434129\_s\_at

1434139\_at  
1434202\_a\_at  
1434350\_at  
1434380\_at  
1434425\_at  
1434438\_at  
1434457\_at  
1434955\_at  
1434980\_at  
1435144\_at  
1435263\_at  
1435264\_at  
1435265\_at  
1435280\_at  
1435315\_s\_at  
1435331\_at  
1435454\_a\_at  
1435477\_s\_at  
1435529\_at  
1435551\_at  
1435560\_at  
1435582\_at  
1435584\_at  
1435595\_at  
1435621\_at  
1435665\_at  
1435719\_at  
1435792\_at  
1435906\_x\_at  
1435933\_at  
1436058\_at  
1436160\_at  
1436171\_at  
1436172\_at  
1436199\_at

1436482\_a\_at  
1436530\_at  
1436590\_at  
1436625\_at  
1436659\_at  
1436671\_at  
1436722\_a\_at  
1436763\_a\_at  
1436778\_at  
1436779\_at  
1436838\_x\_at  
1436871\_at  
1436873\_at  
1436902\_x\_at  
1436996\_x\_at  
1436999\_at  
1437024\_at  
1437072\_at  
1437129\_at  
1437218\_at  
1437234\_x\_at  
1437440\_at  
1437514\_at  
1437570\_at  
1437811\_x\_at  
1437899\_at  
1438037\_at  
1438052\_at  
1438075\_at  
1438148\_at  
1438220\_at  
1438295\_at  
1438566\_at  
1438651\_a\_at  
1438704\_at

1438707\_at  
1438768\_at  
1438800\_at  
1438862\_at  
1438868\_at  
1438896\_at  
1438931\_s\_at  
1438980\_x\_at  
1438989\_s\_at  
1439016\_x\_at  
1439030\_at  
1439081\_at  
1439100\_s\_at  
1439426\_x\_at  
1439494\_at  
1439622\_at  
1439774\_at  
1439793\_at  
1439806\_at  
1439814\_at  
1439825\_at  
1439902\_at  
1439912\_at  
1439947\_at  
1439948\_at  
1439956\_at  
1440007\_at  
1440037\_at  
1440150\_at  
1440169\_x\_at  
1440196\_at  
1440225\_at  
1440226\_at  
1440298\_at  
1440311\_at

1440342\_at  
1440461\_at  
1440635\_at  
1440719\_at  
1440721\_at  
1440852\_at  
1440865\_at  
1440866\_at  
1440986\_at  
1441094\_at  
1441189\_at  
1441307\_at  
1441376\_at  
1441444\_at  
1441445\_at  
1441887\_x\_at  
1442018\_at  
1442025\_a\_at  
1442026\_at  
1442074\_at  
1442082\_at  
1442089\_at  
1442233\_at  
1442257\_at  
1442393\_at  
1442425\_at  
1442461\_at  
1442804\_at  
1442977\_at  
1443043\_at  
1443116\_at  
1443128\_at  
1443235\_at  
1443338\_at  
1443673\_x\_at

1443698\_at  
1443771\_x\_at  
1443894\_at  
1443962\_at  
1443983\_at  
1444195\_at  
1444226\_at  
1444376\_at  
1444456\_at  
1444546\_at  
1444559\_at  
1444599\_at  
1445104\_at  
1445518\_at  
1445687\_at  
1445882\_at  
1446001\_at  
1446269\_at  
1446609\_at  
1446684\_at  
1446693\_at  
1446921\_at  
1447181\_s\_at  
1447213\_at  
1447329\_at  
1447517\_at  
1447527\_at  
1447584\_s\_at  
1447621\_s\_at  
1448025\_at  
1448061\_at  
1448160\_at  
1448162\_at  
1448181\_at  
1448291\_at



1448301\_s\_at  
1448325\_at  
1448397\_at  
1448507\_at  
1448529\_at  
1448534\_at  
1448561\_at  
1448575\_at  
1448576\_at  
1448591\_at  
1448617\_at  
1448620\_at  
1448632\_at  
1448700\_at  
1448710\_at  
1448731\_at  
1448747\_at  
1448748\_at  
1448749\_at  
1448756\_at  
1448797\_at  
1448877\_at  
1448883\_at  
1448898\_at  
1448929\_at  
1449009\_at  
1449025\_at  
1449049\_at  
1449124\_at  
1449127\_at  
1449135\_at  
1449153\_at  
1449164\_at  
1449175\_at  
1449176\_a\_at

1449254\_at  
1449305\_at  
1449360\_at  
1449366\_at  
1449387\_at  
1449399\_a\_at  
1449451\_at  
1449453\_at  
1449454\_at  
1449455\_at  
1449461\_at  
1449556\_at  
1449559\_at  
1449560\_at  
1449591\_at  
1449824\_at  
1449858\_at  
1449874\_at  
1449919\_at  
1449945\_at  
1449963\_at  
1449976\_a\_at  
1449981\_a\_at  
1449984\_at  
1449986\_at  
1450027\_at  
1450033\_a\_at  
1450034\_at  
1450065\_at  
1450135\_at  
1450165\_at  
1450170\_x\_at  
1450188\_s\_at  
1450199\_a\_at  
1450234\_at

1450241\_a\_at  
1450291\_s\_at  
1450297\_at  
1450322\_s\_at  
1450379\_at  
1450403\_at  
1450454\_at  
1450484\_a\_at  
1450505\_a\_at  
1450508\_at  
1450517\_at  
1450536\_s\_at  
1450616\_at  
1450618\_a\_at  
1450639\_at  
1450645\_at  
1450678\_at  
1450696\_at  
1450774\_at  
1450783\_at  
1450788\_at  
1450792\_at  
1450808\_at  
1450826\_a\_at  
1450843\_a\_at  
1450871\_a\_at  
1450919\_at  
1450967\_at  
1451156\_s\_at  
1451161\_a\_at  
1451174\_at  
1451318\_a\_at  
1451335\_at  
1451362\_at  
1451382\_at

1451426\_at  
1451564\_at  
1451567\_a\_at  
1451634\_at  
1451655\_at  
1451767\_at  
1451774\_at  
1451777\_at  
1451798\_at  
1451859\_at  
1451860\_a\_at  
1451905\_a\_at  
1451941\_a\_at  
1451956\_a\_at  
1452016\_at  
1452087\_at  
1452117\_a\_at  
1452126\_at  
1452203\_at  
1452261\_at  
1452279\_at  
1452348\_s\_at  
1452349\_x\_at  
1452382\_at  
1452487\_x\_at  
1452527\_a\_at  
1452719\_at  
1452948\_at  
1452957\_at  
1453196\_a\_at  
1453247\_at  
1453287\_at  
1453332\_at  
1453410\_at  
1453503\_at

1453523\_at  
1453591\_at  
1453628\_s\_at  
1453898\_at  
1454018\_at  
1454169\_a\_at  
1454242\_at  
1454268\_a\_at  
1454646\_at  
1454699\_at  
1454867\_at  
1454878\_at  
1455058\_at  
1455065\_x\_at  
1455203\_at  
1455238\_at  
1455269\_a\_at  
1455332\_x\_at  
1455418\_at  
1455419\_at  
1455500\_at  
1455573\_at  
1455581\_x\_at  
1455660\_at  
1455860\_at  
1455899\_x\_at  
1456001\_at  
1456014\_s\_at  
1456047\_at  
1456103\_at  
1456147\_at  
1456307\_s\_at  
1456331\_at  
1456341\_a\_at  
1456377\_x\_at

1456440\_s\_at  
1456494\_a\_at  
1456733\_x\_at  
1456772\_at  
1456815\_at  
1456890\_at  
1456901\_at  
1456944\_at  
1457042\_at  
1457117\_at  
1457228\_x\_at  
1457644\_s\_at  
1457666\_s\_at  
1457753\_at  
1457967\_at  
1458053\_at  
1458299\_s\_at  
1458354\_x\_at  
1458426\_at  
1458467\_at  
1458680\_at  
1459003\_at  
1459219\_at  
1459760\_at  
1459823\_at  
1460020\_at  
1460036\_at  
1460185\_at  
1460188\_at  
1460218\_at  
1460227\_at  
1460259\_s\_at  
1460283\_at  
1460336\_at  
1460437\_at

1460603\_at  
1460604\_at  
1460668\_at
