# Supplementary material for: Fibroblasts accelerate islet revascularization and improve long-term graft survival in a mouse model of subcutaneous islet transplantation
Source: PubMed Central journal article supplement (PMC5495486; doi:10.1371/journal.pone.0180695), 2017-07-03
Supplement: pone.0180695.s004.pdf [file pone.0180695.s004.pdf]

## Day 3

---

### Prob SET\_ID

| Specific PSI-F genes | Specific PSI genes | Common genes |
|----------------------|--------------------|--------------|
| 1415780_a_at         | 1416067_at         | 1415712_at   |
| 1415806_at           | 1416505_at         | 1415951_at   |
| 1415836_at           | 1416897_at         | 1415983_at   |
| 1415877_at           | 1417025_at         | 1416151_at   |
| 1415893_at           | 1417141_at         | 1416152_a_at |
| 1415905_at           | 1417244_a_at       | 1416191_at   |
| 1415906_at           | 1417292_at         | 1416200_at   |
| 1415923_at           | 1417821_at         | 1416226_at   |
| 1415989_at           | 1417898_a_at       | 1416246_a_at |
| 1415994_at           | 1418126_at         | 1416295_a_at |
| 1416002_x_at         | 1418191_at         | 1416296_at   |
| 1416035_at           | 1418240_at         | 1416318_at   |
| 1416188_at           | 1418293_at         | 1416342_at   |
| 1416190_a_at         | 1418392_a_at       | 1416356_at   |
| 1416273_at           | 1418534_at         | 1416407_at   |
| 1416298_at           | 1418580_at         | 1416414_at   |
| 1416325_at           | 1418652_at         | 1416527_at   |
| 1416326_at           | 1418769_at         | 1416617_at   |
| 1416340_a_at         | 1418776_at         | 1416686_at   |
| 1416382_at           | 1418979_at         | 1416687_at   |
| 1416390_at           | 1419220_at         | 1416714_at   |
| 1416548_at           | 1419603_at         | 1416740_at   |
| 1416559_at           | 1419604_at         | 1416741_at   |
| 1416572_at           | 1419605_at         | 1416871_at   |
| 1416576_at           | 1420575_at         | 1416935_at   |
| 1416613_at           | 1420582_at         | 1416956_at   |
| 1416627_at           | 1420936_s_at       | 1416985_at   |
| 1416776_at           | 1422160_at         | 1416986_a_at |
| 1416818_at           | 1422558_at         | 1417018_at   |

|              |              |              |
|--------------|--------------|--------------|
| 1416832_at   | 1422672_at   | 1417070_at   |
| 1416926_at   | 1422908_at   | 1417104_at   |
| 1416981_at   | 1424775_at   | 1417219_s_at |
| 1416983_s_at | 1424923_at   | 1417266_at   |
| 1417045_at   | 1425065_at   | 1417273_at   |
| 1417069_a_at | 1425374_at   | 1417314_at   |
| 1417092_at   | 1425394_at   | 1417381_at   |
| 1417130_s_at | 1426005_at   | 1417392_a_at |
| 1417234_at   | 1426278_at   | 1417426_at   |
| 1417256_at   | 1426415_a_at | 1417439_at   |
| 1417262_at   | 1426464_at   | 1417522_at   |
| 1417263_at   | 1428111_at   | 1417523_at   |
| 1417267_s_at | 1428615_at   | 1417620_at   |
| 1417268_at   | 1429947_a_at | 1417634_at   |
| 1417272_at   | 1430126_at   | 1417676_a_at |
| 1417391_a_at | 1430295_at   | 1417793_at   |
| 1417601_at   | 1431591_s_at | 1417813_at   |
| 1417633_at   | 1431830_at   | 1417876_at   |
| 1417649_at   | 1431836_x_at | 1417936_at   |
| 1417653_at   | 1433902_at   | 1417961_a_at |
| 1417697_at   | 1433933_s_at | 1417963_at   |
| 1417741_at   | 1434139_at   | 1417976_at   |
| 1417786_a_at | 1434372_at   | 1418008_at   |
| 1417802_at   | 1434438_at   | 1418084_at   |
| 1417803_at   | 1434618_at   | 1418099_at   |
| 1417836_at   | 1435603_at   | 1418204_s_at |
| 1418028_at   | 1435621_at   | 1418248_at   |
| 1418061_at   | 1435665_at   | 1418261_at   |
| 1418069_at   | 1435792_at   | 1418288_at   |
| 1418076_at   | 1435906_x_at | 1418323_at   |
| 1418091_at   | 1436067_at   | 1418340_at   |
| 1418133_at   | 1436202_at   | 1418344_at   |
| 1418162_at   | 1436482_a_at | 1418345_at   |

|              |              |              |
|--------------|--------------|--------------|
| 1418172_at   | 1436576_at   | 1418379_s_at |
| 1418173_at   | 1436625_at   | 1418396_at   |
| 1418174_at   | 1437162_at   | 1418402_at   |
| 1418262_at   | 1438037_at   | 1418424_at   |
| 1418269_at   | 1438239_at   | 1418440_at   |
| 1418296_at   | 1439041_at   | 1418465_at   |
| 1418318_at   | 1439221_s_at | 1418480_at   |
| 1418364_a_at | 1439831_at   | 1418483_a_at |
| 1418492_at   | 1440202_at   | 1418509_at   |
| 1418589_a_at | 1442484_at   | 1418538_at   |
| 1418595_at   | 1442632_at   | 1418547_at   |
| 1418616_at   | 1442745_x_at | 1418626_a_at |
| 1418678_at   | 1443167_at   | 1418641_at   |
| 1418706_at   | 1443962_at   | 1418666_at   |
| 1418709_at   | 1444487_at   | 1418697_at   |
| 1418742_at   | 1444599_at   | 1418736_at   |
| 1418755_at   | 1446521_at   | 1418747_at   |
| 1418806_at   | 1446921_at   | 1418809_at   |
| 1418815_at   | 1448452_at   | 1418826_at   |
| 1418829_a_at | 1448576_at   | 1418842_at   |
| 1418852_at   | 1449130_at   | 1418932_at   |
| 1418895_at   | 1449131_s_at | 1418936_at   |
| 1418951_at   | 1449446_at   | 1418944_at   |
| 1418989_at   | 1449556_at   | 1418945_at   |
| 1418992_at   | 1449580_s_at | 1418946_at   |
| 1419062_at   | 1450027_at   | 1419004_s_at |
| 1419098_at   | 1450033_a_at | 1419042_at   |
| 1419100_at   | 1450170_x_at | 1419043_a_at |
| 1419128_at   | 1450454_at   | 1419099_x_at |
| 1419132_at   | 1450696_at   | 1419120_at   |
| 1419146_a_at | 1450783_at   | 1419125_at   |
| 1419193_a_at | 1451348_at   | 1419149_at   |
| 1419219_at   | 1451426_at   | 1419186_a_at |

1419249\_at  
1419295\_at  
1419323\_at  
1419327\_at  
1419449\_a\_at  
1419463\_at  
1419507\_at  
1419509\_a\_at  
1419526\_at  
1419534\_at  
1419555\_at  
1419586\_at  
1419589\_at  
1419591\_at  
1419610\_at  
1419693\_at  
1419707\_at  
1419709\_at  
1419767\_at  
1419810\_x\_at  
1419840\_at  
1419971\_s\_at  
1420331\_at  
1420346\_at  
1420358\_at  
1420382\_at  
1420409\_at  
1420413\_at  
1420538\_at  
1420558\_at  
1420599\_at  
1420653\_at  
1420674\_at

1451564\_at  
1451905\_a\_at  
1451989\_a\_at  
1452067\_at  
1452358\_at  
1452417\_x\_at  
1452500\_at  
1452610\_at  
1452815\_at  
1453136\_at  
1453571\_at  
1454283\_at  
1455493\_at  
1455500\_at  
1455679\_at  
1455778\_at  
1456424\_s\_at  
1456475\_s\_at  
1456676\_a\_at  
1457692\_at  
1458065\_at  
1458426\_at  
1458585\_at

1419194\_s\_at  
1419206\_at  
1419209\_at  
1419282\_at  
1419309\_at  
1419321\_at  
1419394\_s\_at  
1419431\_at  
1419455\_at  
1419474\_a\_at  
1419480\_at  
1419482\_at  
1419483\_at  
1419487\_at  
1419519\_at  
1419537\_at  
1419549\_at  
1419561\_at  
1419573\_a\_at  
1419587\_s\_at  
1419598\_at  
1419599\_s\_at  
1419609\_at  
1419627\_s\_at  
1419631\_at  
1419684\_at  
1419692\_a\_at  
1419703\_at  
1419714\_at  
1419728\_at  
1419764\_at  
1419872\_at  
1419873\_s\_at

1420686\_at  
1420693\_at  
1420728\_at  
1420779\_at  
1420819\_at  
1420991\_at  
1420992\_at  
1421034\_a\_at  
1421355\_at  
1421366\_at  
1421457\_a\_at  
1421589\_at  
1421691\_at  
1421698\_a\_at  
1421775\_at  
1421813\_a\_at  
1421856\_at  
1421871\_at  
1422209\_s\_at  
1422301\_at  
1422302\_s\_at  
1422498\_at  
1422542\_at  
1422588\_at  
1422639\_at  
1422743\_at  
1422744\_at  
1422755\_at  
1422771\_at  
1422783\_a\_at  
1422784\_at  
1422808\_s\_at  
1422831\_at

1419874\_x\_at  
1420161\_at  
1420249\_s\_at  
1420310\_at  
1420330\_at  
1420361\_at  
1420380\_at  
1420394\_s\_at  
1420398\_at  
1420415\_at  
1420464\_s\_at  
1420465\_s\_at  
1420498\_a\_at  
1420671\_x\_at  
1420697\_at  
1420699\_at  
1420703\_at  
1420751\_at  
1420804\_s\_at  
1420915\_at  
1420970\_at  
1421074\_at  
1421075\_s\_at  
1421106\_at  
1421171\_at  
1421172\_at  
1421186\_at  
1421187\_at  
1421188\_at  
1421228\_at  
1421326\_at  
1421408\_at  
1421492\_at

1422852\_at  
1422868\_s\_at  
1423017\_a\_at  
1423100\_at  
1423135\_at  
1423174\_a\_at  
1423175\_s\_at  
1423267\_s\_at  
1423326\_at  
1423327\_at  
1423350\_at  
1423396\_at  
1423407\_a\_at  
1423478\_at  
1423590\_at  
1423593\_a\_at  
1423606\_at  
1423607\_at  
1423635\_at  
1423693\_at  
1423753\_at  
1423860\_at  
1423909\_at  
1423915\_at  
1423996\_a\_at  
1424099\_at  
1424157\_at  
1424234\_s\_at  
1424254\_at  
1424265\_at  
1424338\_at  
1424382\_at  
1424495\_a\_at

1421525\_a\_at  
1421551\_s\_at  
1421596\_s\_at  
1421644\_at  
1421689\_at  
1421694\_a\_at  
1421792\_s\_at  
1421839\_at  
1421977\_at  
1422013\_at  
1422046\_at  
1422062\_at  
1422124\_a\_at  
1422153\_a\_at  
1422190\_at  
1422191\_at  
1422264\_s\_at  
1422317\_a\_at  
1422341\_s\_at  
1422430\_at  
1422437\_at  
1422446\_x\_at  
1422447\_at  
1422562\_at  
1422570\_at  
1422601\_at  
1422628\_at  
1422875\_at  
1422903\_at  
1422932\_a\_at  
1422953\_at  
1422973\_a\_at  
1422977\_at

1424526\_a\_at  
1424542\_at  
1424650\_at  
1424692\_at  
1424717\_at  
1424824\_at  
1424831\_at  
1424832\_at  
1424906\_at  
1425002\_at  
1425145\_at  
1425237\_at  
1425431\_at  
1425567\_a\_at  
1425575\_at  
1425603\_at  
1425801\_x\_at  
1425850\_a\_at  
1425874\_at  
1425942\_a\_at  
1425958\_at  
1425967\_a\_at  
1426010\_a\_at  
1426025\_s\_at  
1426037\_a\_at  
1426165\_a\_at  
1426180\_a\_at  
1426221\_at  
1426306\_a\_at  
1426314\_at  
1426383\_at  
1426642\_at  
1426725\_s\_at

1422978\_at  
1423140\_at  
1423141\_at  
1423155\_at  
1423182\_at  
1423294\_at  
1423321\_at  
1423547\_at  
1423555\_a\_at  
1423569\_at  
1423570\_at  
1423672\_at  
1423704\_at  
1423768\_at  
1423805\_at  
1423858\_a\_at  
1424033\_at  
1424131\_at  
1424211\_at  
1424271\_at  
1424302\_at  
1424312\_at  
1424349\_a\_at  
1424375\_s\_at  
1424443\_at  
1424524\_at  
1424552\_at  
1424556\_at  
1424659\_at  
1424683\_at  
1424713\_at  
1424727\_at  
1424737\_at

1426958\_at  
1427007\_at  
1427045\_at  
1427055\_at  
1427118\_at  
1427179\_at  
1427180\_at  
1427211\_at  
1427290\_at  
1427298\_at  
1427327\_at  
1427329\_a\_at  
1427364\_a\_at  
1427365\_at  
1427366\_at  
1427378\_at  
1427483\_at  
1427556\_at  
1427700\_x\_at  
1427719\_s\_at  
1427751\_a\_at  
1427883\_a\_at  
1428007\_at  
1428081\_at  
1428130\_at  
1428288\_at  
1428306\_at  
1428352\_at  
1428357\_at  
1428393\_at  
1428420\_a\_at  
1428444\_at  
1428485\_at

1424754\_at  
1424795\_a\_at  
1424807\_at  
1424927\_at  
1424938\_at  
1424965\_at  
1425001\_at  
1425025\_at  
1425099\_a\_at  
1425133\_s\_at  
1425214\_at  
1425225\_at  
1425282\_at  
1425303\_at  
1425407\_s\_at  
1425420\_s\_at  
1425430\_at  
1425435\_at  
1425451\_s\_at  
1425548\_a\_at  
1425598\_a\_at  
1425609\_at  
1425662\_at  
1425829\_a\_at  
1425860\_x\_at  
1425863\_a\_at  
1425872\_at  
1425894\_at  
1425896\_a\_at  
1425917\_at  
1425951\_a\_at  
1426039\_a\_at  
1426154\_s\_at



1428538\_s\_at  
1428636\_at  
1428733\_at  
1428767\_at  
1428835\_at  
1428854\_at  
1428902\_at  
1428926\_at  
1428988\_at  
1429065\_at  
1429104\_at  
1429180\_at  
1429215\_at  
1429219\_at  
1429297\_at  
1429298\_at  
1429300\_at  
1429413\_at  
1429530\_a\_at  
1429598\_at  
1429778\_at  
1429944\_at  
1429957\_at  
1430036\_at  
1430132\_at  
1430332\_a\_at  
1430357\_at  
1430460\_at  
1430509\_at  
1430604\_a\_at  
1430612\_at  
1430635\_at  
1430669\_at

1426203\_at  
1426454\_at  
1426501\_a\_at  
1426505\_at  
1426516\_a\_at  
1426536\_at  
1426604\_at  
1426806\_at  
1426971\_at  
1427041\_at  
1427056\_at  
1427072\_at  
1427076\_at  
1427102\_at  
1427200\_at  
1427256\_at  
1427301\_at  
1427321\_s\_at  
1427339\_at  
1427381\_at  
1427388\_at  
1427540\_at  
1427549\_s\_at  
1427566\_at  
1427747\_a\_at  
1427884\_at  
1427892\_at  
1427994\_at  
1428018\_a\_at  
1428083\_at  
1428129\_at  
1428289\_at  
1428294\_at

1430703\_at  
1430731\_at  
1431171\_at  
1431504\_at  
1431650\_at  
1431724\_a\_at  
1431805\_a\_at  
1431843\_a\_at  
1432001\_at  
1432129\_a\_at  
1432331\_a\_at  
1432352\_at  
1432517\_a\_at  
1432540\_at  
1432885\_at  
1433147\_at  
1433398\_at  
1433512\_at  
1433596\_at  
1433711\_s\_at  
1433719\_at  
1433877\_at  
1434013\_at  
1434061\_at  
1434067\_at  
1434068\_s\_at  
1434069\_at  
1434130\_at  
1434190\_at  
1434316\_at  
1434362\_at  
1434425\_at  
1434430\_s\_at

1428391\_at  
1428392\_at  
1428492\_at  
1428699\_at  
1428748\_at  
1428786\_at  
1428787\_at  
1428903\_at  
1429140\_at  
1429169\_at  
1429184\_at  
1429235\_at  
1429344\_at  
1429524\_at  
1429525\_s\_at  
1429570\_at  
1429637\_at  
1429679\_at  
1429693\_at  
1429775\_a\_at  
1429831\_at  
1429866\_at  
1429914\_at  
1429918\_at  
1429954\_at  
1430030\_at  
1430172\_a\_at  
1430379\_at  
1430447\_a\_at  
1430462\_at  
1430579\_at  
1430581\_at  
1430584\_s\_at

1434542\_at  
1434628\_a\_at  
1434893\_at  
1434940\_x\_at  
1435043\_at  
1435105\_at  
1435110\_at  
1435125\_at  
1435134\_at  
1435143\_at  
1435154\_at  
1435184\_at  
1435190\_at  
1435280\_at  
1435343\_at  
1435364\_at  
1435370\_a\_at  
1435373\_at  
1435382\_at  
1435383\_x\_at  
1435468\_at  
1435551\_at  
1435567\_at  
1435584\_at  
1435585\_at  
1435605\_at  
1435639\_at  
1435679\_at  
1435761\_at  
1435893\_at  
1435933\_at  
1435945\_a\_at  
1436001\_at

1430623\_s\_at  
1430655\_at  
1430700\_a\_at  
1431004\_at  
1431094\_at  
1431166\_at  
1431182\_at  
1431394\_a\_at  
1431705\_a\_at  
1433434\_at  
1433465\_a\_at  
1433466\_at  
1433617\_s\_at  
1433678\_at  
1433741\_at  
1433836\_a\_at  
1433837\_at  
1433930\_at  
1433963\_a\_at  
1434099\_at  
1434100\_x\_at  
1434110\_x\_at  
1434129\_s\_at  
1434202\_a\_at  
1434350\_at  
1434380\_at  
1434413\_at  
1434457\_at  
1434479\_at  
1434955\_at  
1434980\_at  
1435059\_at  
1435144\_at

1436074\_at  
1436119\_at  
1436160\_at  
1436193\_at  
1436236\_x\_at  
1436309\_at  
1436312\_at  
1436319\_at  
1436361\_at  
1436398\_at  
1436431\_at  
1436532\_at  
1436557\_at  
1436671\_at  
1436722\_a\_at  
1436873\_at  
1436905\_x\_at  
1436913\_at  
1436999\_at  
1437024\_at  
1437121\_at  
1437152\_at  
1437185\_s\_at  
1437234\_x\_at  
1437303\_at  
1437440\_at  
1437445\_at  
1437451\_at  
1437458\_x\_at  
1437570\_at  
1437576\_at  
1437668\_at  
1437689\_x\_at

1435263\_at  
1435264\_at  
1435315\_s\_at  
1435331\_at  
1435375\_at  
1435476\_a\_at  
1435477\_s\_at  
1435560\_at  
1435582\_at  
1435595\_at  
1435719\_at  
1435903\_at  
1436037\_at  
1436171\_at  
1436172\_at  
1436199\_at  
1436397\_at  
1436453\_at  
1436530\_at  
1436590\_at  
1436594\_at  
1436659\_at  
1436763\_a\_at  
1436778\_at  
1436779\_at  
1436838\_x\_at  
1436871\_at  
1436902\_x\_at  
1436996\_x\_at  
1437129\_at  
1437218\_at  
1437245\_at  
1437401\_at

1437718\_x\_at  
1437751\_at  
1437788\_at  
1437873\_at  
1437899\_at  
1437902\_s\_at  
1437904\_at  
1438130\_at  
1438202\_at  
1438211\_s\_at  
1438220\_at  
1438345\_at  
1438385\_s\_at  
1438405\_at  
1438483\_at  
1438531\_at  
1438566\_at  
1438608\_at  
1438639\_x\_at  
1438676\_at  
1438707\_at  
1438768\_at  
1438796\_at  
1438855\_x\_at  
1438862\_at  
1438980\_x\_at  
1438989\_s\_at  
1439015\_at  
1439016\_x\_at  
1439030\_at  
1439100\_s\_at  
1439148\_a\_at  
1439263\_at

1437514\_at  
1437811\_x\_at  
1438052\_at  
1438059\_at  
1438075\_at  
1438104\_at  
1438148\_at  
1438295\_at  
1438475\_at  
1438651\_a\_at  
1438702\_at  
1438704\_at  
1438775\_at  
1438800\_at  
1438896\_at  
1438931\_s\_at  
1439081\_at  
1439163\_at  
1439173\_at  
1439426\_x\_at  
1439622\_at  
1439774\_at  
1439814\_at  
1439902\_at  
1439912\_at  
1439948\_at  
1439956\_at  
1440007\_at  
1440037\_at  
1440169\_x\_at  
1440196\_at  
1440226\_at  
1440635\_at

1439389\_s\_at  
1439494\_at  
1439589\_at  
1439675\_at  
1439764\_s\_at  
1439793\_at  
1439806\_at  
1439836\_at  
1439947\_at  
1440010\_at  
1440123\_at  
1440150\_at  
1440225\_at  
1440250\_at  
1440311\_at  
1440441\_at  
1440840\_at  
1440985\_at  
1441020\_at  
1441056\_at  
1441094\_at  
1441111\_at  
1441307\_at  
1441516\_a\_at  
1441991\_at  
1442089\_at  
1442116\_at  
1442118\_at  
1442169\_at  
1442257\_at  
1442339\_at  
1442425\_at  
1442804\_at

1440719\_at  
1440721\_at  
1440852\_at  
1441083\_at  
1441189\_at  
1441376\_at  
1441445\_at  
1442018\_at  
1442025\_a\_at  
1442026\_at  
1442082\_at  
1442393\_at  
1442461\_at  
1443116\_at  
1443128\_at  
1443235\_at  
1443745\_s\_at  
1443858\_at  
1443894\_at  
1443949\_at  
1444195\_at  
1444226\_at  
1444376\_at  
1444456\_at  
1444546\_at  
1445104\_at  
1445381\_at  
1445518\_at  
1445882\_at  
1446001\_at  
1446269\_at  
1446609\_at  
1446684\_at

1442977\_at  
1443043\_at  
1443323\_at  
1443558\_s\_at  
1443591\_at  
1443771\_x\_at  
1443960\_at  
1443983\_at  
1444061\_at  
1444289\_at  
1444447\_at  
1444493\_at  
1444559\_at  
1445687\_at  
1446326\_at  
1447116\_at  
1447284\_at  
1447670\_at  
1447713\_at  
1447830\_s\_at  
1447852\_x\_at  
1447927\_at  
1448201\_at  
1448250\_at  
1448276\_at  
1448291\_at  
1448326\_a\_at  
1448377\_at  
1448407\_at  
1448449\_at  
1448457\_at  
1448470\_at  
1448484\_at

1446693\_at  
1447181\_s\_at  
1447213\_at  
1447329\_at  
1447517\_at  
1447527\_at  
1447584\_s\_at  
1447621\_s\_at  
1448025\_at  
1448061\_at  
1448124\_at  
1448160\_at  
1448162\_at  
1448163\_at  
1448181\_at  
1448183\_a\_at  
1448239\_at  
1448259\_at  
1448301\_s\_at  
1448316\_at  
1448325\_at  
1448534\_at  
1448550\_at  
1448561\_at  
1448575\_at  
1448591\_at  
1448594\_at  
1448617\_at  
1448620\_at  
1448700\_at  
1448710\_at  
1448731\_at  
1448732\_at

1448485\_at  
1448507\_at  
1448593\_at  
1448601\_s\_at  
1448605\_at  
1448636\_at  
1448648\_at  
1448742\_at  
1448756\_at  
1448816\_at  
1448872\_at  
1448877\_at  
1448881\_at  
1448932\_at  
1449036\_at  
1449091\_at  
1449169\_at  
1449227\_at  
1449305\_at  
1449356\_at  
1449366\_at  
1449378\_at  
1449387\_at  
1449401\_at  
1449451\_at  
1449456\_a\_at  
1449559\_at  
1449560\_at  
1449591\_at  
1449632\_s\_at  
1449755\_at  
1449851\_at  
1449856\_at

1448747\_at  
1448748\_at  
1448749\_at  
1448797\_at  
1448823\_at  
1448883\_at  
1448894\_at  
1448898\_at  
1448901\_at  
1448929\_at  
1448943\_at  
1448944\_at  
1448995\_at  
1449009\_at  
1449049\_at  
1449124\_at  
1449127\_at  
1449135\_at  
1449153\_at  
1449164\_at  
1449175\_at  
1449193\_at  
1449254\_at  
1449282\_at  
1449310\_at  
1449360\_at  
1449399\_a\_at  
1449453\_at  
1449454\_at  
1449455\_at  
1449461\_at  
1449858\_at  
1449874\_at



1449859\_at  
1449865\_at  
1449873\_at  
1449901\_a\_at  
1449919\_at  
1449963\_at  
1449986\_at  
1449996\_a\_at  
1449997\_at  
1450014\_at  
1450105\_at  
1450136\_at  
1450162\_at  
1450165\_at  
1450214\_at  
1450259\_a\_at  
1450322\_s\_at  
1450377\_at  
1450392\_at  
1450449\_a\_at  
1450468\_at  
1450475\_at  
1450508\_at  
1450536\_s\_at  
1450618\_a\_at  
1450629\_at  
1450645\_at  
1450734\_at  
1450757\_at  
1450774\_at  
1450779\_at  
1450808\_at  
1450919\_at

1449945\_at  
1449976\_a\_at  
1449981\_a\_at  
1449984\_at  
1450034\_at  
1450047\_at  
1450065\_at  
1450135\_at  
1450199\_a\_at  
1450234\_at  
1450241\_a\_at  
1450291\_s\_at  
1450297\_at  
1450379\_at  
1450430\_at  
1450505\_a\_at  
1450616\_at  
1450625\_at  
1450639\_at  
1450641\_at  
1450678\_at  
1450792\_at  
1450826\_a\_at  
1450843\_a\_at  
1450871\_a\_at  
1450872\_s\_at  
1450967\_at  
1451156\_s\_at  
1451161\_a\_at  
1451174\_at  
1451318\_a\_at  
1451335\_at  
1451353\_at

1450939\_at  
1450958\_at  
1451097\_at  
1451203\_at  
1451289\_at  
1451362\_at  
1451374\_x\_at  
1451415\_at  
1451537\_at  
1451563\_at  
1451774\_at  
1451775\_s\_at  
1451798\_at  
1451978\_at  
1452093\_at  
1452163\_at  
1452277\_at  
1452352\_at  
1452410\_a\_at  
1452433\_at  
1452483\_a\_at  
1452487\_x\_at  
1452504\_s\_at  
1452521\_a\_at  
1452595\_at  
1452803\_at  
1452857\_at  
1452861\_at  
1452881\_at  
1452913\_at  
1452957\_at  
1453009\_at  
1453247\_at

1451382\_at  
1451478\_at  
1451567\_a\_at  
1451648\_a\_at  
1451655\_at  
1451716\_at  
1451755\_a\_at  
1451762\_a\_at  
1451767\_at  
1451777\_at  
1451859\_at  
1451860\_a\_at  
1451886\_at  
1451941\_a\_at  
1451956\_a\_at  
1452014\_a\_at  
1452016\_at  
1452087\_at  
1452117\_a\_at  
1452126\_at  
1452191\_at  
1452203\_at  
1452261\_at  
1452279\_at  
1452345\_at  
1452348\_s\_at  
1452349\_x\_at  
1452382\_at  
1452436\_at  
1452527\_a\_at  
1452707\_at  
1452719\_at  
1452948\_at

1453344\_at  
1453355\_at  
1453410\_at  
1453523\_at  
1453775\_at  
1453898\_at  
1454242\_at  
1454713\_s\_at  
1454734\_at  
1454764\_s\_at  
1454806\_at  
1454830\_at  
1455007\_s\_at  
1455030\_at  
1455094\_s\_at  
1455136\_at  
1455160\_at  
1455161\_at  
1455220\_at  
1455226\_at  
1455267\_at  
1455271\_at  
1455396\_at  
1455419\_at  
1455426\_at  
1455455\_at  
1455573\_at  
1455627\_at  
1455737\_at  
1455899\_x\_at  
1456046\_at  
1456047\_at  
1456064\_at

1452968\_at  
1453196\_a\_at  
1453287\_at  
1453332\_at  
1453455\_at  
1453503\_at  
1453591\_at  
1453628\_s\_at  
1454018\_at  
1454169\_a\_at  
1454240\_at  
1454268\_a\_at  
1454613\_at  
1454699\_at  
1454768\_at  
1454849\_x\_at  
1454867\_at  
1454878\_at  
1455050\_at  
1455058\_at  
1455065\_x\_at  
1455096\_at  
1455269\_a\_at  
1455332\_x\_at  
1455377\_at  
1455418\_at  
1455439\_a\_at  
1455473\_at  
1455660\_at  
1455860\_at  
1456014\_s\_at  
1456307\_s\_at  
1456331\_at

1456147\_at  
1456212\_x\_at  
1456389\_at  
1456395\_at  
1456404\_at  
1456440\_s\_at  
1456706\_at  
1456739\_x\_at  
1456815\_at  
1456893\_at  
1456901\_at  
1456929\_at  
1456944\_at  
1456968\_at  
1457231\_at  
1457266\_at  
1457586\_at  
1457644\_s\_at  
1457721\_at  
1457881\_at  
1457967\_at  
1458354\_x\_at  
1458660\_at  
1458680\_at  
1458781\_at  
1458919\_at  
1459170\_at  
1459238\_at  
1459557\_at  
1459622\_at  
1460014\_at  
1460185\_at  
1460202\_at

1456341\_a\_at  
1456344\_at  
1456377\_x\_at  
1456442\_at  
1456733\_x\_at  
1456772\_at  
1457042\_at  
1457117\_at  
1457228\_x\_at  
1457243\_at  
1457666\_s\_at  
1457753\_at  
1457779\_at  
1458299\_s\_at  
1458382\_a\_at  
1458467\_at  
1459202\_at  
1459219\_at  
1459760\_at  
1459823\_at  
1460020\_at  
1460036\_at  
1460188\_at  
1460197\_a\_at  
1460208\_at  
1460218\_at  
1460227\_at  
1460283\_at  
1460336\_at  
1460377\_a\_at  
1460419\_a\_at  
1460437\_at  
1460603\_at

1460220\_a\_at

1460253\_at

1460259\_s\_at

1460273\_a\_at

1460281\_at

1460302\_at

1460347\_at

1460600\_at

1460604\_at

AFFX-b-ActinMur/M12481\_M\_at
