# Supplementary material for: Fibroblasts accelerate islet revascularization and improve long-term graft survival in a mouse model of subcutaneous islet transplantation
Source: PubMed Central journal article supplement (PMC5495486; doi:10.1371/journal.pone.0180695), 2017-07-03
Supplement: pone.0180695.s005.pdf [file pone.0180695.s005.pdf]

## Day 7

---

### Prob SET\_ID

| Specific PSI-F genes | Specific PSI genes | Common genes |
|----------------------|--------------------|--------------|
| 1415712_at           | 1415806_at         | 1415780_a_at |
| 1415906_at           | 1415832_at         | 1415923_at   |
| 1415996_at           | 1415861_at         | 1415951_at   |
| 1415997_at           | 1415862_at         | 1415983_at   |
| 1416002_x_at         | 1415927_at         | 1416067_at   |
| 1416191_at           | 1415972_at         | 1416111_at   |
| 1416332_at           | 1416006_at         | 1416125_at   |
| 1416340_a_at         | 1416151_at         | 1416129_at   |
| 1416617_at           | 1416652_at         | 1416200_at   |
| 1416832_at           | 1416776_at         | 1416246_a_at |
| 1416875_at           | 1416803_at         | 1416295_a_at |
| 1416897_at           | 1416805_at         | 1416296_at   |
| 1416926_at           | 1417092_at         | 1416342_at   |
| 1416982_at           | 1417234_at         | 1416356_at   |
| 1416983_s_at         | 1417267_s_at       | 1416390_at   |
| 1417172_at           | 1417359_at         | 1416405_at   |
| 1417244_a_at         | 1417599_at         | 1416407_at   |
| 1417381_at           | 1417600_at         | 1416414_at   |
| 1417392_a_at         | 1417601_at         | 1416454_s_at |
| 1417639_at           | 1417821_at         | 1416572_at   |
| 1417898_a_at         | 1417851_at         | 1416589_at   |
| 1417902_at           | 1417943_at         | 1416687_at   |
| 1417961_a_at         | 1418008_at         | 1416714_at   |
| 1417963_at           | 1418063_at         | 1416740_at   |
| 1417976_at           | 1418173_at         | 1416741_at   |
| 1418100_at           | 1418174_at         | 1416818_at   |
| 1418261_at           | 1418282_x_at       | 1416871_at   |
| 1418269_at           | 1418283_at         | 1416882_at   |
| 1418293_at           | 1418424_at         | 1416981_at   |

|              |              |              |
|--------------|--------------|--------------|
| 1418344_at   | 1418450_at   | 1416985_at   |
| 1418396_at   | 1418454_at   | 1417018_at   |
| 1418432_at   | 1418483_a_at | 1417025_at   |
| 1418480_at   | 1418492_at   | 1417063_at   |
| 1418487_at   | 1418571_at   | 1417070_at   |
| 1418488_s_at | 1418616_at   | 1417104_at   |
| 1418493_a_at | 1418742_at   | 1417141_at   |
| 1418718_at   | 1418829_a_at | 1417219_s_at |
| 1418747_at   | 1418945_at   | 1417256_at   |
| 1418769_at   | 1418979_at   | 1417262_at   |
| 1418825_at   | 1418989_at   | 1417272_at   |
| 1418842_at   | 1419209_at   | 1417273_at   |
| 1418887_a_at | 1419249_at   | 1417281_a_at |
| 1418930_at   | 1419323_at   | 1417282_at   |
| 1419015_at   | 1419463_at   | 1417292_at   |
| 1419060_at   | 1419487_at   | 1417314_at   |
| 1419132_at   | 1419507_at   | 1417439_at   |
| 1419220_at   | 1419591_at   | 1417522_at   |
| 1419309_at   | 1419662_at   | 1417523_at   |
| 1419369_at   | 1419707_at   | 1417620_at   |
| 1419404_s_at | 1419709_at   | 1417676_a_at |
| 1419449_a_at | 1419767_at   | 1417793_at   |
| 1419480_at   | 1419840_at   | 1417802_at   |
| 1419485_at   | 1420358_at   | 1417803_at   |
| 1419486_at   | 1420465_s_at | 1417813_at   |
| 1419492_s_at | 1420538_at   | 1417836_at   |
| 1419505_a_at | 1420599_at   | 1417876_at   |
| 1419537_at   | 1420674_at   | 1418061_at   |
| 1419569_a_at | 1420855_at   | 1418084_at   |
| 1419603_at   | 1420940_x_at | 1418099_at   |
| 1419604_at   | 1420970_at   | 1418126_at   |
| 1419631_at   | 1420994_at   | 1418136_at   |
| 1419697_at   | 1421002_at   | 1418191_at   |

1419714\_at  
1419762\_at  
1420398\_at  
1420549\_at  
1420583\_a\_at  
1420671\_x\_at  
1420703\_at  
1421058\_at  
1421106\_at  
1421182\_at  
1421290\_at  
1421366\_at  
1421525\_a\_at  
1421551\_s\_at  
1421792\_s\_at  
1421977\_at  
1422062\_at  
1422143\_at  
1422340\_a\_at  
1422412\_x\_at  
1422527\_at  
1422557\_s\_at  
1422560\_at  
1422633\_at  
1422932\_a\_at  
1423141\_at  
1423182\_at  
1423375\_at  
1423858\_a\_at  
1423862\_at  
1424034\_at  
1424296\_at  
1424349\_a\_at

1421045\_at  
1421385\_a\_at  
1421424\_a\_at  
1421492\_at  
1421589\_at  
1422209\_s\_at  
1422430\_at  
1422571\_at  
1422580\_at  
1422831\_at  
1422908\_at  
1422977\_at  
1423037\_at  
1423100\_at  
1423136\_at  
1423155\_at  
1423261\_at  
1423321\_at  
1423365\_at  
1423439\_at  
1423554\_at  
1423584\_at  
1423608\_at  
1423635\_at  
1423672\_at  
1423860\_at  
1423909\_at  
1424010\_at  
1424032\_at  
1424083\_at  
1424157\_at  
1424374\_at  
1424659\_at

1418204\_s\_at  
1418240\_at  
1418288\_at  
1418323\_at  
1418340\_at  
1418345\_at  
1418379\_s\_at  
1418392\_a\_at  
1418402\_at  
1418440\_at  
1418465\_at  
1418534\_at  
1418538\_at  
1418547\_at  
1418572\_x\_at  
1418580\_at  
1418599\_at  
1418626\_a\_at  
1418641\_at  
1418652\_at  
1418697\_at  
1418736\_at  
1418776\_at  
1418809\_at  
1418815\_at  
1418826\_at  
1418932\_at  
1418936\_at  
1419004\_s\_at  
1419042\_at  
1419043\_a\_at  
1419120\_at  
1419125\_at

1424409\_at  
1424724\_a\_at  
1424857\_a\_at  
1425065\_at  
1425156\_at  
1425225\_at  
1425374\_at  
1425394\_at  
1425407\_s\_at  
1425425\_a\_at  
1425477\_x\_at  
1425480\_at  
1425801\_x\_at  
1426025\_s\_at  
1426040\_a\_at  
1426348\_at  
1426383\_at  
1426464\_at  
1426521\_at  
1426970\_a\_at  
1427007\_at  
1427042\_at  
1427135\_at  
1427271\_at  
1427381\_at  
1427397\_at  
1427511\_at  
1427660\_x\_at  
1427866\_x\_at  
1428081\_at  
1428111\_at  
1428288\_at  
1428572\_at

1424692\_at  
1424824\_at  
1425227\_a\_at  
1425431\_at  
1425567\_a\_at  
1425603\_at  
1425681\_a\_at  
1426005\_at  
1426039\_a\_at  
1426154\_s\_at  
1426208\_x\_at  
1426225\_at  
1426536\_at  
1426758\_s\_at  
1426852\_x\_at  
1426864\_a\_at  
1426871\_at  
1427056\_at  
1427115\_at  
1427118\_at  
1427179\_at  
1427211\_at  
1427256\_at  
1427290\_at  
1427344\_s\_at  
1427365\_at  
1427366\_at  
1427378\_at  
1427751\_a\_at  
1428007\_at  
1428259\_at  
1428615\_at  
1428721\_at

1419128\_at  
1419146\_a\_at  
1419149\_at  
1419186\_a\_at  
1419194\_s\_at  
1419282\_at  
1419295\_at  
1419321\_at  
1419431\_at  
1419474\_a\_at  
1419482\_at  
1419483\_at  
1419491\_at  
1419519\_at  
1419561\_at  
1419573\_a\_at  
1419589\_at  
1419598\_at  
1419599\_s\_at  
1419609\_at  
1419627\_s\_at  
1419684\_at  
1419703\_at  
1419728\_at  
1419816\_s\_at  
1419872\_at  
1419874\_x\_at  
1420097\_at  
1420161\_at  
1420330\_at  
1420361\_at  
1420380\_at  
1420394\_s\_at

1428699\_at  
1428742\_at  
1428767\_at  
1428939\_s\_at  
1429050\_at  
1429216\_at  
1429247\_at  
1429251\_at  
1429530\_a\_at  
1429759\_at  
1429947\_a\_at  
1430114\_at  
1430357\_at  
1430462\_at  
1430575\_a\_at  
1430576\_at  
1431176\_at  
1431591\_s\_at  
1431805\_a\_at  
1431843\_a\_at  
1433617\_s\_at  
1433863\_at  
1433935\_at  
1434069\_at  
1434359\_at  
1434438\_at  
1434542\_at  
1434927\_at  
1435169\_at  
1435205\_at  
1435264\_at  
1435265\_at  
1435316\_at

1428748\_at  
1428922\_at  
1429065\_at  
1429219\_at  
1429300\_at  
1429344\_at  
1429802\_at  
1429866\_at  
1429957\_at  
1429960\_at  
1430132\_at  
1430388\_a\_at  
1430509\_at  
1430623\_s\_at  
1430655\_at  
1430669\_at  
1430703\_at  
1430731\_at  
1431079\_at  
1431094\_at  
1431394\_a\_at  
1431504\_at  
1431650\_at  
1431836\_x\_at  
1432540\_at  
1432885\_at  
1433512\_at  
1433600\_at  
1434186\_at  
1434202\_a\_at  
1434325\_x\_at  
1434425\_at  
1434740\_at

1420415\_at  
1420464\_s\_at  
1420498\_a\_at  
1420504\_at  
1420686\_at  
1420697\_at  
1420699\_at  
1420728\_at  
1420731\_a\_at  
1420751\_at  
1420804\_s\_at  
1420915\_at  
1421074\_at  
1421075\_s\_at  
1421171\_at  
1421172\_at  
1421187\_at  
1421188\_at  
1421228\_at  
1421326\_at  
1421408\_at  
1421596\_s\_at  
1421689\_at  
1421691\_at  
1421694\_a\_at  
1421856\_at  
1422013\_at  
1422124\_a\_at  
1422301\_at  
1422341\_s\_at  
1422437\_at  
1422446\_x\_at  
1422447\_at

|              |              |              |
|--------------|--------------|--------------|
| 1435331_at   | 1434848_at   | 1422542_at   |
| 1435364_at   | 1435021_at   | 1422558_at   |
| 1435476_a_at | 1435059_at   | 1422570_at   |
| 1435562_at   | 1435120_at   | 1422588_at   |
| 1435665_at   | 1435143_at   | 1422601_at   |
| 1435792_at   | 1435162_at   | 1422606_at   |
| 1435945_a_at | 1435315_s_at | 1422628_at   |
| 1436058_at   | 1435373_at   | 1422875_at   |
| 1436199_at   | 1435382_at   | 1422903_at   |
| 1436202_at   | 1435409_at   | 1422953_at   |
| 1436309_at   | 1435468_at   | 1422973_a_at |
| 1436326_at   | 1435584_at   | 1422978_at   |
| 1436431_at   | 1435585_at   | 1423110_at   |
| 1436722_a_at | 1435872_at   | 1423140_at   |
| 1436853_a_at | 1435940_at   | 1423169_at   |
| 1436905_x_at | 1435952_at   | 1423174_a_at |
| 1437071_at   | 1436025_at   | 1423175_s_at |
| 1437100_x_at | 1436160_at   | 1423233_at   |
| 1437665_at   | 1436188_a_at | 1423294_at   |
| 1437676_at   | 1436713_s_at | 1423396_at   |
| 1437689_x_at | 1436873_at   | 1423407_a_at |
| 1437726_x_at | 1436898_at   | 1423516_a_at |
| 1437751_at   | 1437303_at   | 1423547_at   |
| 1438027_at   | 1437440_at   | 1423555_a_at |
| 1438037_at   | 1437873_at   | 1423569_at   |
| 1438052_at   | 1437889_x_at | 1423606_at   |
| 1438220_at   | 1438202_at   | 1423607_at   |
| 1438325_at   | 1438211_s_at | 1423669_at   |
| 1438345_at   | 1438238_at   | 1423704_at   |
| 1438473_at   | 1438707_at   | 1423768_at   |
| 1438475_at   | 1438768_at   | 1423915_at   |
| 1438663_at   | 1438800_at   | 1424033_at   |
| 1438775_at   | 1438931_s_at | 1424084_at   |

1438855\_x\_at  
1438868\_at  
1438900\_at  
1439080\_at  
1439081\_at  
1439221\_s\_at  
1439316\_at  
1439638\_at  
1439819\_at  
1439831\_at  
1440007\_at  
1440085\_at  
1440092\_at  
1440225\_at  
1440250\_at  
1440903\_at  
1440990\_at  
1441231\_at  
1441233\_at  
1441346\_at  
1441410\_at  
1441956\_s\_at  
1442044\_at  
1442535\_at  
1442804\_at  
1443109\_at  
1443167\_at  
1443621\_at  
1443698\_at  
1443960\_at  
1444180\_at  
1444447\_at  
1444599\_at

1438989\_s\_at  
1439016\_x\_at  
1439100\_s\_at  
1439163\_at  
1439380\_x\_at  
1439389\_s\_at  
1439556\_at  
1439665\_at  
1439793\_at  
1440226\_at  
1440355\_at  
1440852\_at  
1440866\_at  
1441108\_at  
1441307\_at  
1441779\_at  
1441793\_at  
1441799\_at  
1442089\_at  
1442461\_at  
1443128\_at  
1443323\_at  
1443558\_s\_at  
1443745\_s\_at  
1444061\_at  
1444494\_at  
1445391\_at  
1446048\_at  
1446190\_at  
1447669\_s\_at  
1448424\_at  
1448457\_at  
1448475\_at

1424099\_at  
1424131\_at  
1424211\_at  
1424234\_s\_at  
1424271\_at  
1424302\_at  
1424312\_at  
1424375\_s\_at  
1424382\_at  
1424394\_at  
1424443\_at  
1424524\_at  
1424552\_at  
1424556\_at  
1424650\_at  
1424683\_at  
1424713\_at  
1424727\_at  
1424737\_at  
1424754\_at  
1424775\_at  
1424795\_a\_at  
1424807\_at  
1424923\_at  
1424927\_at  
1424965\_at  
1425001\_at  
1425025\_at  
1425099\_a\_at  
1425133\_s\_at  
1425214\_at  
1425237\_at  
1425282\_at

1444787\_at  
1444790\_at  
1445225\_at  
1446167\_at  
1446504\_at  
1446684\_at  
1446802\_at  
1446921\_at  
1447116\_at  
1447211\_at  
1447551\_x\_at  
1447706\_at  
1448021\_at  
1448169\_at  
1448239\_at  
1448250\_at  
1448380\_at  
1448433\_a\_at  
1448436\_a\_at  
1448452\_at  
1448470\_at  
1448534\_at  
1448561\_at  
1448601\_s\_at  
1448632\_at  
1448883\_at  
1448952\_at  
1448995\_at  
1449025\_at  
1449065\_at  
1449193\_at  
1449195\_s\_at  
1449227\_at

1448648\_at  
1449154\_at  
1449378\_at  
1449387\_at  
1449396\_at  
1449451\_at  
1449531\_at  
1449556\_at  
1449859\_at  
1449986\_at  
1450085\_at  
1450170\_x\_at  
1450379\_at  
1450618\_a\_at  
1450663\_at  
1450734\_at  
1450774\_at  
1451047\_at  
1451342\_at  
1451344\_at  
1451415\_at  
1451446\_at  
1451475\_at  
1451513\_x\_at  
1451774\_at  
1452114\_s\_at  
1452183\_a\_at  
1452261\_at  
1452595\_at  
1452670\_at  
1452719\_at  
1452957\_at  
1454240\_at

1425303\_at  
1425420\_s\_at  
1425430\_at  
1425519\_a\_at  
1425548\_a\_at  
1425575\_at  
1425598\_a\_at  
1425662\_at  
1425860\_x\_at  
1425872\_at  
1425894\_at  
1425896\_a\_at  
1425905\_at  
1425917\_at  
1425951\_a\_at  
1426203\_at  
1426306\_a\_at  
1426413\_at  
1426454\_at  
1426505\_at  
1426516\_a\_at  
1426604\_at  
1426642\_at  
1426725\_s\_at  
1426806\_at  
1426865\_a\_at  
1426947\_x\_at  
1426971\_at  
1427041\_at  
1427076\_at  
1427102\_at  
1427168\_a\_at  
1427200\_at



|              |              |              |
|--------------|--------------|--------------|
| 1449446_at   | 1454242_at   | 1427298_at   |
| 1449461_at   | 1454613_at   | 1427301_at   |
| 1449473_s_at | 1454878_at   | 1427327_at   |
| 1449500_at   | 1454965_at   | 1427339_at   |
| 1449580_s_at | 1455050_at   | 1427388_at   |
| 1449733_s_at | 1455058_at   | 1427391_a_at |
| 1449851_at   | 1455090_at   | 1427539_a_at |
| 1449856_at   | 1455096_at   | 1427540_at   |
| 1450027_at   | 1455422_x_at | 1427549_s_at |
| 1450135_at   | 1455700_at   | 1427566_at   |
| 1450165_at   | 1455860_at   | 1427719_s_at |
| 1450234_at   | 1456001_at   | 1427883_a_at |
| 1450353_at   | 1456047_at   | 1427884_at   |
| 1450417_a_at | 1456147_at   | 1427892_at   |
| 1450511_at   | 1456442_at   | 1427919_at   |
| 1450648_s_at | 1456475_s_at | 1427994_at   |
| 1451077_at   | 1456676_a_at | 1428018_a_at |
| 1451335_at   | 1456705_at   | 1428057_a_at |
| 1451426_at   | 1456736_x_at | 1428083_at   |
| 1451439_at   | 1456815_at   | 1428273_at   |
| 1451601_a_at | 1457145_at   | 1428294_at   |
| 1451655_at   | 1457227_at   | 1428306_at   |
| 1451675_a_at | 1457429_s_at | 1428352_at   |
| 1451721_a_at | 1458407_s_at | 1428391_at   |
| 1451723_at   | 1458551_at   | 1428492_at   |
| 1451886_at   | 1458680_at   | 1428786_at   |
| 1451905_a_at | 1459557_at   | 1428787_at   |
| 1452016_at   | 1460049_s_at | 1428926_at   |
| 1452026_a_at | 1460121_at   | 1429006_s_at |
| 1452067_at   | 1460185_at   | 1429104_at   |
| 1452117_a_at | 1460359_at   | 1429140_at   |
| 1452160_at   | 1460419_a_at | 1429184_at   |
| 1452279_at   |              | 1429215_at   |

1452298\_a\_at  
1452345\_at  
1452348\_s\_at  
1452415\_at  
1452440\_at  
1452500\_at  
1452606\_at  
1453012\_at  
1453119\_at  
1453214\_at  
1453251\_at  
1453571\_at  
1453628\_s\_at  
1454018\_at  
1454646\_at  
1454849\_x\_at  
1454863\_at  
1454867\_at  
1455007\_s\_at  
1455094\_s\_at  
1455136\_at  
1455165\_at  
1455171\_at  
1455351\_at  
1455500\_at  
1455785\_at  
1456014\_s\_at  
1456103\_at  
1456156\_at  
1456211\_at  
1456347\_at  
1456395\_at  
1456659\_at

1429235\_at  
1429297\_at  
1429298\_at  
1429379\_at  
1429413\_at  
1429524\_at  
1429525\_s\_at  
1429570\_at  
1429637\_at  
1429679\_at  
1429775\_a\_at  
1429831\_at  
1429914\_at  
1429918\_at  
1429944\_at  
1429954\_at  
1430126\_at  
1430295\_at  
1430447\_a\_at  
1430460\_at  
1430579\_at  
1430581\_at  
1430584\_s\_at  
1430585\_at  
1430635\_at  
1430700\_a\_at  
1431004\_at  
1431166\_at  
1431171\_at  
1431856\_a\_at  
1432331\_a\_at  
1432352\_at  
1433434\_at

1456706\_at  
1456875\_at  
1456907\_at  
1456968\_at  
1457198\_at  
1457302\_at  
1457321\_at  
1457666\_s\_at  
1457742\_at  
1457823\_at  
1458053\_at  
1458065\_at  
1458305\_at  
1458586\_at  
1458660\_at  
1458919\_at  
1459170\_at  
1459202\_at  
1459238\_at  
1459391\_at  
1459434\_at  
1459601\_at  
1459609\_at  
1459707\_at  
1460025\_at  
1460036\_at  
1460253\_at  
1460318\_at  
1460441\_at  
AFFX-b-ActinMur/M12481\_M\_at  
AFFX-DapX-5\_at  
AFFX-MURINE\_b1\_at  
AFFX-r2-Bs-thr-5\_s\_at

1433596\_at  
1433678\_at  
1433711\_s\_at  
1433716\_x\_at  
1433741\_at  
1433837\_at  
1433877\_at  
1433930\_at  
1434099\_at  
1434100\_x\_at  
1434129\_s\_at  
1434130\_at  
1434139\_at  
1434195\_at  
1434316\_at  
1434350\_at  
1434372\_at  
1434380\_at  
1434411\_at  
1434413\_at  
1434457\_at  
1434479\_at  
1434628\_a\_at  
1434817\_s\_at  
1434955\_at  
1435125\_at  
1435144\_at  
1435263\_at  
1435271\_at  
1435375\_at  
1435477\_s\_at  
1435560\_at  
1435582\_at

AFFX-ThrX-5\_at

1435595\_at  
1435719\_at  
1435906\_x\_at  
1436037\_at  
1436171\_at  
1436172\_at  
1436236\_x\_at  
1436325\_at  
1436453\_at  
1436530\_at  
1436576\_at  
1436590\_at  
1436659\_at  
1436671\_at  
1436763\_a\_at  
1436778\_at  
1436779\_at  
1436838\_x\_at  
1436871\_at  
1436902\_x\_at  
1436996\_x\_at  
1437024\_at  
1437129\_at  
1437152\_at  
1437162\_at  
1437185\_s\_at  
1437218\_at  
1437401\_at  
1437570\_at  
1437668\_at  
1437811\_x\_at  
1437899\_at  
1438059\_at

1438075\_at  
1438295\_at  
1438404\_at  
1438531\_at  
1438651\_a\_at  
1438704\_at  
1438796\_at  
1438814\_at  
1438862\_at  
1438896\_at  
1439426\_x\_at  
1439557\_s\_at  
1439622\_at  
1439643\_at  
1439774\_at  
1439790\_at  
1439806\_at  
1439814\_at  
1439827\_at  
1439912\_at  
1439947\_at  
1439948\_at  
1439956\_at  
1440010\_at  
1440037\_at  
1440123\_at  
1440169\_x\_at  
1440311\_at  
1440347\_at  
1440435\_at  
1440441\_at  
1440635\_at  
1440719\_at

1440720\_s\_at  
1440721\_at  
1441056\_at  
1441083\_at  
1441094\_at  
1441189\_at  
1441315\_s\_at  
1441376\_at  
1441445\_at  
1442018\_at  
1442025\_a\_at  
1442026\_at  
1442082\_at  
1442116\_at  
1442140\_at  
1442169\_at  
1442393\_at  
1442425\_at  
1442977\_at  
1443043\_at  
1443116\_at  
1443235\_at  
1443673\_x\_at  
1443858\_at  
1443894\_at  
1443962\_at  
1443983\_at  
1444195\_at  
1444226\_at  
1444376\_at  
1444456\_at  
1444546\_at  
1444559\_at

1444740\_at  
1445365\_at  
1445381\_at  
1445457\_at  
1445866\_at  
1445882\_at  
1446001\_at  
1446269\_at  
1446326\_at  
1446521\_at  
1446693\_at  
1447213\_at  
1447517\_at  
1447527\_at  
1447584\_s\_at  
1447621\_s\_at  
1447852\_x\_at  
1448025\_at  
1448061\_at  
1448124\_at  
1448160\_at  
1448162\_at  
1448163\_at  
1448181\_at  
1448201\_at  
1448259\_at  
1448316\_at  
1448323\_a\_at  
1448325\_at  
1448383\_at  
1448575\_at  
1448590\_at  
1448591\_at

1448593\_at  
1448594\_at  
1448617\_at  
1448620\_at  
1448700\_at  
1448710\_at  
1448729\_a\_at  
1448731\_at  
1448747\_at  
1448748\_at  
1448749\_at  
1448797\_at  
1448823\_at  
1448877\_at  
1448894\_at  
1448901\_at  
1448943\_at  
1448944\_at  
1449009\_at  
1449049\_at  
1449127\_at  
1449130\_at  
1449131\_s\_at  
1449135\_at  
1449153\_at  
1449164\_at  
1449175\_at  
1449244\_at  
1449254\_at  
1449360\_at  
1449399\_a\_at  
1449401\_at  
1449455\_at



1449559\_at  
1449560\_at  
1449632\_s\_at  
1449755\_at  
1449858\_at  
1449874\_at  
1449901\_a\_at  
1449919\_at  
1449945\_at  
1449963\_at  
1449984\_at  
1450014\_at  
1450033\_a\_at  
1450034\_at  
1450047\_at  
1450065\_at  
1450199\_a\_at  
1450241\_a\_at  
1450291\_s\_at  
1450429\_at  
1450505\_a\_at  
1450536\_s\_at  
1450625\_at  
1450641\_at  
1450645\_at  
1450678\_at  
1450696\_at  
1450757\_at  
1450783\_at  
1450792\_at  
1450826\_a\_at  
1450843\_a\_at  
1450857\_a\_at

1450871\_a\_at  
1450872\_s\_at  
1450905\_at  
1450967\_at  
1451069\_at  
1451156\_s\_at  
1451161\_a\_at  
1451174\_at  
1451289\_at  
1451318\_a\_at  
1451319\_at  
1451353\_at  
1451382\_at  
1451478\_at  
1451564\_at  
1451567\_a\_at  
1451762\_a\_at  
1451767\_at  
1451777\_at  
1451859\_at  
1451860\_a\_at  
1451941\_a\_at  
1451978\_at  
1451989\_a\_at  
1452014\_a\_at  
1452087\_at  
1452126\_at  
1452163\_at  
1452203\_at  
1452250\_a\_at  
1452382\_at  
1452417\_x\_at  
1452431\_s\_at

1452436\_at  
1452527\_a\_at  
1452707\_at  
1452948\_at  
1452968\_at  
1453009\_at  
1453136\_at  
1453191\_at  
1453196\_a\_at  
1453287\_at  
1453332\_at  
1453410\_at  
1453455\_at  
1453470\_a\_at  
1453503\_at  
1453523\_at  
1453588\_at  
1453590\_at  
1453591\_at  
1453775\_at  
1454169\_a\_at  
1454268\_a\_at  
1454699\_at  
1454768\_at  
1454830\_at  
1455065\_x\_at  
1455269\_a\_at  
1455332\_x\_at  
1455399\_at  
1455418\_at  
1455426\_at  
1455439\_a\_at  
1455455\_at

1455627\_at  
1455660\_at  
1455773\_at  
1456046\_at  
1456307\_s\_at  
1456341\_a\_at  
1456344\_at  
1456377\_x\_at  
1456440\_s\_at  
1456514\_at  
1456733\_x\_at  
1456739\_x\_at  
1456772\_at  
1456901\_at  
1457024\_x\_at  
1457042\_at  
1457117\_at  
1457228\_x\_at  
1457586\_at  
1457753\_at  
1457777\_at  
1457779\_at  
1457967\_at  
1458299\_s\_at  
1458354\_x\_at  
1458426\_at  
1458467\_at  
1458603\_at  
1459622\_at  
1459749\_s\_at  
1459760\_at  
1459823\_at  
1460020\_at

1460188\_at  
1460208\_at  
1460218\_at  
1460227\_at  
1460283\_at  
1460336\_at  
1460365\_a\_at  
1460437\_at  
1460463\_at  
1460603\_at  
AFFX-r2-Bs-dap-5\_at
