# Supplementary material for: Fibroblasts accelerate islet revascularization and improve long-term graft survival in a mouse model of subcutaneous islet transplantation
Source: PubMed Central journal article supplement (PMC5495486; doi:10.1371/journal.pone.0180695), 2017-07-03
Supplement: pone.0180695.s006.pdf [file pone.0180695.s006.pdf]

## Day 10

---

### Prob SET\_ID

| Specific PSI-F genes | Specific PSI genes | Common genes |
|----------------------|--------------------|--------------|
| 1415927_at           | 1415832_at         | 1415983_at   |
| 1416067_at           | 1415972_at         | 1416111_at   |
| 1416077_at           | 1416125_at         | 1416151_at   |
| 1416356_at           | 1416191_at         | 1416152_a_at |
| 1417419_at           | 1416250_at         | 1416200_at   |
| 1417961_a_at         | 1416342_at         | 1416246_a_at |
| 1417985_at           | 1416527_at         | 1416295_a_at |
| 1418008_at           | 1416871_at         | 1416296_at   |
| 1418174_at           | 1416873_a_at       | 1416325_at   |
| 1418580_at           | 1416985_at         | 1416572_at   |
| 1418616_at           | 1417141_at         | 1416589_at   |
| 1418979_at           | 1417256_at         | 1416714_at   |
| 1419075_s_at         | 1417262_at         | 1416740_at   |
| 1419487_at           | 1417272_at         | 1416741_at   |
| 1420357_s_at         | 1417292_at         | 1417018_at   |
| 1420452_at           | 1417601_at         | 1417025_at   |
| 1420465_s_at         | 1417602_at         | 1417219_s_at |
| 1420599_at           | 1417697_at         | 1417273_at   |
| 1420841_at           | 1418240_at         | 1417314_at   |
| 1420970_at           | 1418379_s_at       | 1417359_at   |
| 1420992_at           | 1418392_a_at       | 1417381_at   |
| 1421001_a_at         | 1418424_at         | 1417439_at   |
| 1421253_at           | 1418440_at         | 1417522_at   |
| 1421290_at           | 1418538_at         | 1417620_at   |
| 1421424_a_at         | 1418638_at         | 1417676_a_at |
| 1421494_at           | 1418930_at         | 1417793_at   |
| 1422153_a_at         | 1418945_at         | 1417813_at   |
| 1422209_s_at         | 1419146_a_at       | 1417876_at   |
| 1422301_at           | 1419149_at         | 1417898_a_at |

|              |              |              |
|--------------|--------------|--------------|
| 1422527_at   | 1419194_s_at | 1418099_at   |
| 1422892_s_at | 1419209_at   | 1418126_at   |
| 1423142_a_at | 1419327_at   | 1418191_at   |
| 1423172_at   | 1419591_at   | 1418204_s_at |
| 1423439_at   | 1419605_at   | 1418288_at   |
| 1424680_at   | 1419697_at   | 1418323_at   |
| 1424775_at   | 1419700_a_at | 1418340_at   |
| 1424857_a_at | 1419709_at   | 1418345_at   |
| 1425431_at   | 1419714_at   | 1418465_at   |
| 1426460_a_at | 1419734_at   | 1418534_at   |
| 1426726_at   | 1419762_at   | 1418547_at   |
| 1426758_s_at | 1420097_at   | 1418641_at   |
| 1426947_x_at | 1420330_at   | 1418652_at   |
| 1427102_at   | 1420380_at   | 1418697_at   |
| 1427364_a_at | 1420421_s_at | 1418769_at   |
| 1427540_at   | 1420549_at   | 1418776_at   |
| 1427549_s_at | 1420657_at   | 1418809_at   |
| 1427556_at   | 1420772_a_at | 1418932_at   |
| 1428111_at   | 1420779_at   | 1418936_at   |
| 1428294_at   | 1420955_at   | 1419004_s_at |
| 1428444_at   | 1421171_at   | 1419042_at   |
| 1428699_at   | 1421172_at   | 1419043_a_at |
| 1428719_at   | 1421228_at   | 1419120_at   |
| 1429140_at   | 1421262_at   | 1419128_at   |
| 1429169_at   | 1421575_at   | 1419186_a_at |
| 1429478_at   | 1421653_a_at | 1419220_at   |
| 1429736_at   | 1422134_at   | 1419282_at   |
| 1430000_at   | 1422831_at   | 1419321_at   |
| 1430126_at   | 1423100_at   | 1419431_at   |
| 1430575_a_at | 1423607_at   | 1419482_at   |
| 1430669_at   | 1424524_at   | 1419483_at   |
| 1430703_at   | 1424807_at   | 1419598_at   |
| 1431292_a_at | 1424923_at   | 1419599_s_at |

1431650\_at  
1432001\_at  
1433593\_at  
1433902\_at  
1433919\_at  
1434359\_at  
1434618\_at  
1434817\_s\_at  
1434976\_x\_at  
1435271\_at  
1435331\_at  
1435562\_at  
1436431\_at  
1436438\_s\_at  
1436713\_s\_at  
1437024\_at  
1437162\_at  
1437245\_at  
1437284\_at  
1437629\_at  
1437676\_at  
1438211\_s\_at  
1438483\_at  
1438768\_at  
1439033\_at  
1439041\_at  
1439440\_x\_at  
1439948\_at  
1440085\_at  
1440225\_at  
1440635\_at  
1440852\_at  
1441108\_at

1425281\_a\_at  
1425282\_at  
1425655\_at  
1425863\_a\_at  
1426383\_at  
1426454\_at  
1426642\_at  
1426851\_a\_at  
1426852\_x\_at  
1427168\_a\_at  
1427298\_at  
1427397\_at  
1427511\_at  
1428306\_at  
1428352\_at  
1428492\_at  
1428786\_at  
1429300\_at  
1429334\_at  
1429525\_s\_at  
1429570\_at  
1430152\_at  
1430392\_at  
1430485\_at  
1430576\_at  
1433836\_a\_at  
1433837\_at  
1434203\_at  
1434362\_at  
1434380\_at  
1434413\_at  
1434542\_at  
1435459\_at

1419609\_at  
1419621\_at  
1419627\_s\_at  
1419684\_at  
1419703\_at  
1419874\_x\_at  
1420161\_at  
1420361\_at  
1420394\_s\_at  
1420464\_s\_at  
1420697\_at  
1420699\_at  
1420855\_at  
1420915\_at  
1421074\_at  
1421187\_at  
1421188\_at  
1421214\_at  
1421326\_at  
1421596\_s\_at  
1422013\_at  
1422124\_a\_at  
1422264\_s\_at  
1422341\_s\_at  
1422430\_at  
1422437\_at  
1422446\_x\_at  
1422447\_at  
1422570\_at  
1422601\_at  
1422606\_at  
1422628\_at  
1422903\_at

1441307\_at  
1441444\_at  
1442089\_at  
1442411\_at  
1442542\_at  
1443167\_at  
1443621\_at  
1443960\_at  
1446155\_at  
1446156\_at  
1446521\_at  
1446921\_at  
1447116\_at  
1447329\_at  
1447852\_x\_at  
1448325\_at  
1448575\_at  
1448700\_at  
1449130\_at  
1449131\_s\_at  
1449356\_at  
1450449\_a\_at  
1450511\_at  
1450648\_s\_at  
1450788\_at  
1451319\_at  
1451323\_at  
1451564\_at  
1451774\_at  
1452183\_a\_at  
1452358\_at  
1452474\_a\_at  
1452857\_at

1435621\_at  
1435906\_x\_at  
1436066\_at  
1436236\_x\_at  
1436361\_at  
1436722\_a\_at  
1437065\_at  
1437303\_at  
1437665\_at  
1438052\_at  
1438238\_at  
1439163\_at  
1439221\_s\_at  
1439819\_at  
1440292\_at  
1440720\_s\_at  
1441083\_at  
1441544\_at  
1441545\_at  
1441549\_at  
1441799\_at  
1442336\_at  
1442393\_at  
1443520\_at  
1444494\_at  
1446129\_at  
1446244\_at  
1446730\_at  
1446834\_at  
1447411\_at  
1447517\_at  
1447584\_s\_at  
1447830\_s\_at

1422973\_a\_at  
1422978\_at  
1423233\_at  
1423294\_at  
1423396\_at  
1423547\_at  
1423555\_a\_at  
1423606\_at  
1423669\_at  
1423672\_at  
1423768\_at  
1424033\_at  
1424131\_at  
1424211\_at  
1424302\_at  
1424305\_at  
1424312\_at  
1424375\_s\_at  
1424443\_at  
1424552\_at  
1424556\_at  
1424683\_at  
1424713\_at  
1424727\_at  
1424737\_at  
1424754\_at  
1424795\_a\_at  
1424927\_at  
1425001\_at  
1425025\_at  
1425099\_a\_at  
1425214\_at  
1425272\_at

1452905\_at  
1452948\_at  
1453012\_at  
1453136\_at  
1453836\_a\_at  
1454018\_at  
1455065\_x\_at  
1455094\_s\_at  
1455165\_at  
1455267\_at  
1455342\_at  
1455377\_at  
1455473\_at  
1455493\_at  
1455500\_at  
1456475\_s\_at  
1456676\_a\_at  
1456706\_at  
1456736\_x\_at  
1456875\_at  
1457587\_at  
1457742\_at  
1458125\_at  
1459219\_at  
1459948\_at

1448201\_at  
1448316\_at  
1448594\_at  
1448617\_at  
1448620\_at  
1448731\_at  
1448748\_at  
1448823\_at  
1448949\_at  
1449254\_at  
1449461\_at  
1449556\_at  
1449851\_at  
1449858\_at  
1449939\_s\_at  
1449984\_at  
1450033\_a\_at  
1450170\_x\_at  
1450172\_at  
1450297\_at  
1450379\_at  
1450757\_at  
1450871\_a\_at  
1451161\_a\_at  
1451318\_a\_at  
1451415\_at  
1451859\_at  
1451956\_a\_at  
1451989\_a\_at  
1452067\_at  
1452163\_at  
1452527\_a\_at  
1453435\_a\_at

1425303\_at  
1425394\_at  
1425420\_s\_at  
1425477\_x\_at  
1425519\_a\_at  
1425548\_a\_at  
1425662\_at  
1425681\_a\_at  
1425738\_at  
1425860\_x\_at  
1425894\_at  
1425896\_a\_at  
1425905\_at  
1425917\_at  
1425951\_a\_at  
1426039\_a\_at  
1426074\_at  
1426505\_at  
1426516\_a\_at  
1426536\_at  
1426604\_at  
1426727\_s\_at  
1426806\_at  
1426971\_at  
1427041\_at  
1427045\_at  
1427076\_at  
1427200\_at  
1427301\_at  
1427321\_s\_at  
1427327\_at  
1427339\_at  
1427351\_s\_at

|                             |              |
|-----------------------------|--------------|
| 1453455_at                  | 1427388_at   |
| 1454830_at                  | 1427455_x_at |
| 1454881_s_at                | 1427566_at   |
| 1455007_s_at                | 1427660_x_at |
| 1455773_at                  | 1427883_a_at |
| 1455889_at                  | 1427884_at   |
| 1456331_at                  | 1427892_at   |
| 1456377_x_at                | 1427994_at   |
| 1456442_at                  | 1428083_at   |
| 1456514_at                  | 1428288_at   |
| 1456741_s_at                | 1428400_at   |
| 1456907_at                  | 1428615_at   |
| 1456968_at                  | 1428720_s_at |
| 1457447_at                  | 1428748_at   |
| 1457579_at                  | 1428787_at   |
| 1457823_at                  | 1428926_at   |
| 1458065_at                  | 1429006_s_at |
| 1458426_at                  | 1429184_at   |
| 1458660_at                  | 1429215_at   |
| 1459557_at                  | 1429235_at   |
| 1460121_at                  | 1429297_at   |
| 1460227_at                  | 1429344_at   |
| 1460463_at                  | 1429524_at   |
| AFFX-b-ActinMur/M12481_M_at | 1429637_at   |
|                             | 1429679_at   |
|                             | 1429831_at   |
|                             | 1429866_at   |
|                             | 1429914_at   |
|                             | 1429918_at   |
|                             | 1429954_at   |
|                             | 1430295_at   |
|                             | 1430460_at   |
|                             | 1430462_at   |

1430579\_at  
1430581\_at  
1430584\_s\_at  
1430585\_at  
1430655\_at  
1431166\_at  
1433147\_at  
1433434\_at  
1433678\_at  
1433711\_s\_at  
1434099\_at  
1434100\_x\_at  
1434129\_s\_at  
1434202\_a\_at  
1434350\_at  
1434372\_at  
1434457\_at  
1434479\_at  
1434927\_at  
1435125\_at  
1435144\_at  
1435263\_at  
1435265\_at  
1435280\_at  
1435315\_s\_at  
1435477\_s\_at  
1435560\_at  
1435595\_at  
1435665\_at  
1435719\_at  
1435792\_at  
1436039\_at  
1436171\_at

1436172\_at  
1436453\_at  
1436576\_at  
1436590\_at  
1436659\_at  
1436737\_a\_at  
1436763\_a\_at  
1436778\_at  
1436779\_at  
1436838\_x\_at  
1436871\_at  
1436902\_x\_at  
1436996\_x\_at  
1437218\_at  
1437668\_at  
1437751\_at  
1437811\_x\_at  
1437873\_at  
1438009\_at  
1438059\_at  
1438075\_at  
1438220\_at  
1438385\_s\_at  
1438651\_a\_at  
1438702\_at  
1438704\_at  
1438796\_at  
1438814\_at  
1438862\_at  
1438896\_at  
1438900\_at  
1438931\_s\_at  
1439081\_at



1439426\_x\_at  
1439622\_at  
1439643\_at  
1439774\_at  
1439806\_at  
1439814\_at  
1439836\_at  
1439912\_at  
1440007\_at  
1440037\_at  
1440092\_at  
1440169\_x\_at  
1440226\_at  
1440311\_at  
1440719\_at  
1441189\_at  
1441346\_at  
1441376\_at  
1441410\_at  
1441445\_at  
1441956\_s\_at  
1441964\_at  
1442025\_a\_at  
1442026\_at  
1442082\_at  
1442169\_at  
1442461\_at  
1442715\_at  
1442977\_at  
1443116\_at  
1443128\_at  
1443235\_at  
1443323\_at

1443894\_at  
1443962\_at  
1443983\_at  
1444195\_at  
1444218\_at  
1444226\_at  
1444376\_at  
1444456\_at  
1444487\_at  
1444531\_at  
1444546\_at  
1444599\_at  
1445381\_at  
1445866\_at  
1445882\_at  
1446001\_at  
1446269\_at  
1446318\_at  
1446326\_at  
1446693\_at  
1447213\_at  
1447527\_at  
1447621\_s\_at  
1448025\_at  
1448160\_at  
1448162\_at  
1448181\_at  
1448259\_at  
1448591\_at  
1448747\_at  
1448749\_at  
1448797\_at  
1449009\_at

1449049\_at  
1449127\_at  
1449135\_at  
1449153\_at  
1449164\_at  
1449360\_at  
1449399\_a\_at  
1449455\_at  
1449580\_s\_at  
1449755\_at  
1449945\_at  
1449981\_a\_at  
1450034\_at  
1450065\_at  
1450241\_a\_at  
1450291\_s\_at  
1450505\_a\_at  
1450616\_at  
1450625\_at  
1450678\_at  
1450696\_at  
1450783\_at  
1450792\_at  
1450826\_a\_at  
1450843\_a\_at  
1450967\_at  
1451156\_s\_at  
1451174\_at  
1451478\_at  
1451567\_a\_at  
1451721\_a\_at  
1451762\_a\_at  
1451767\_at

1451777\_at  
1451860\_a\_at  
1451886\_at  
1451941\_a\_at  
1452087\_at  
1452126\_at  
1452203\_at  
1452261\_at  
1452345\_at  
1452382\_at  
1452417\_x\_at  
1452431\_s\_at  
1452463\_x\_at  
1452478\_at  
1452500\_at  
1452707\_at  
1452719\_at  
1452968\_at  
1453196\_a\_at  
1453214\_at  
1453287\_at  
1453332\_at  
1453503\_at  
1453571\_at  
1453628\_s\_at  
1453782\_at  
1454169\_a\_at  
1454240\_at  
1454268\_a\_at  
1454699\_at  
1454768\_at  
1454867\_at  
1455096\_at

1455136\_at  
1455269\_a\_at  
1455332\_x\_at  
1455399\_at  
1455418\_at  
1455573\_at  
1455660\_at  
1455778\_at  
1455860\_at  
1456307\_s\_at  
1456341\_a\_at  
1456344\_at  
1456395\_at  
1456632\_at  
1456655\_at  
1456705\_at  
1456733\_x\_at  
1456944\_at  
1457042\_at  
1457117\_at  
1457228\_x\_at  
1457459\_at  
1457586\_at  
1457753\_at  
1457779\_at  
1458053\_at  
1458299\_s\_at  
1458586\_at  
1458603\_at  
1459202\_at  
1459238\_at  
1459391\_at  
1459760\_at

1459823\_at  
1460020\_at  
1460188\_at  
1460208\_at  
1460218\_at  
1460336\_at  
1460437\_at  
1460603\_at
